# Supplementary material for: Community-based interventions for non-communicable diseases in Africa: A scoping review of scope, effectiveness, and implementation factors
Source: Research Square preprint supplement (doi:10.21203/rs.3.rs-8508373/v1), 2026-01-13
Supplement: Supplementary file 1 [file afee16215dd8afe83e17bb19.docx]

**Pubmed**

("Community-Based Participatory Research"[MeSH] OR community[MeSH] OR "community-based intervention*"[tiab] OR "community health services"[MeSH] OR "community engagement"[tiab] OR "community health workers"[MeSH] OR "community health programs"[tiab] OR "community participation"[MeSH] )

AND ("non-communicable diseases"[Mesh] OR "chronic disease"[MeSH Terms] OR "cardiovascular diseases"[MeSH Terms] OR "hypertension"[MeSH] OR "diabetes mellitus"[MeSH Terms] OR "neoplasms"[MeSH] OR "cancer"[tiab] OR "chronic respiratory diseases"[tiab] OR "asthma"[MeSH] OR "obesity"[MeSH] OR "mental disorders"[MeSH] OR schizophrenia[MeSH] OR parkinson’s[MeSH] OR alzheimer’s[MeSH] OR "chronic Kidney disease*"[tiab] )

AND (Africa[MeSH] OR African[tiab] OR "Sub-Saharan Africa"[tiab] OR "Sub Saharan Africa"[tiab] OR "SSA"[tiab] OR "West Africa"[tiab] OR "East Africa"[tiab] OR "Central Africa"[tiab] OR "Southern Africa"[tiab] OR "North Africa"[tiab] OR "Algeria"[tiab] OR "Angola"[tiab] OR "Benin"[tiab] OR "Botswana"[tiab] OR "Burkina Faso"[tiab] OR "Burundi"[tiab] OR "Cabo Verde"[tiab] OR "Cape Verde"[tiab] OR "Cameroon"[tiab] OR "Central African Republic"[tiab] OR "Chad"[tiab] OR "Comoros"[tiab] OR "Congo"[tiab] OR "Democratic Republic of Congo"[tiab] OR "Republic of the Congo"[tiab] OR "DRC"[tiab] OR "Djibouti"[tiab] OR "Egypt"[tiab] OR "Equatorial Guinea"[tiab] OR "Eritrea"[tiab] OR "Eswatini"[tiab] OR "Swaziland"[tiab] OR "Ethiopia"[tiab] OR "Gabon"[tiab] OR "Gambia"[tiab] OR "Ghana"[tiab] OR "Guinea"[tiab] OR "Guinea-Bissau"[tiab] OR "Ivory Coast"[tiab] OR "Cote d'Ivoire"[tiab] OR "Kenya"[tiab] OR "Lesotho"[tiab] OR "Liberia"[tiab] OR "Libya"[tiab] OR "Madagascar"[tiab] OR "Malawi"[tiab] OR "Mali"[tiab] OR "Mauritania"[tiab] OR "Mauritius"[tiab] OR "Morocco"[tiab] OR "Mozambique"[tiab] OR "Namibia"[tiab] OR "Niger"[tiab] OR "Nigeria"[tiab] OR "Rwanda"[tiab] OR "Sao Tome and Principe"[tiab] OR "Senegal"[tiab] OR "Seychelles"[tiab] OR "Sierra Leone"[tiab] OR "Somalia"[tiab] OR "South Africa"[tiab] OR "South Sudan"[tiab] OR "Sudan"[tiab] OR "Tanzania"[tiab] OR "Togo"[tiab] OR "Tunisia"[tiab] OR "Uganda"[tiab] OR "Zambia"[tiab] OR "Zimbabwe"[tiab])

**Scopus**

TITLE-ABS-KEY("community-based intervention*" OR "community engagement" OR "community health workers" OR "community health programs" OR "community participation")

)

AND

(

TITLE-ABS-KEY("non-communicable disease*" OR "chronic disease*" OR "cardiovascular disease*" OR "hypertension" OR "diabetes mellitus" OR "neoplasms" OR "cancer" OR "chronic respiratory disease*" OR "asthma" OR "obesity" OR "mental disorder*" OR "schizophrenia" OR "parkinson*" OR "alzheimer*" OR "chronic kidney disease*")

)

AND

(

TITLE-ABS-KEY("Africa" OR "African" OR "Sub-Saharan Africa" OR "Sub Saharan Africa" OR "SSA" OR "West Africa" OR "East Africa" OR "Central Africa" OR "Southern Africa" OR "North Africa" OR

"Algeria" OR "Angola" OR "Benin" OR "Botswana" OR "Burkina Faso" OR "Burundi" OR "Cabo Verde" OR "Cape Verde" OR "Cameroon" OR "Central African Republic" OR "Chad" OR "Comoros" OR

"Congo" OR "Democratic Republic of Congo" OR "Republic of the Congo" OR "DRC" OR "Djibouti" OR "Egypt" OR "Equatorial Guinea" OR "Eritrea" OR "Eswatini" OR "Swaziland" OR "Ethiopia" OR

"Gabon" OR "Gambia" OR "Ghana" OR "Guinea" OR "Guinea-Bissau" OR "Ivory Coast" OR "Cote d'Ivoire" OR "Kenya" OR "Lesotho" OR "Liberia" OR "Libya" OR "Madagascar" OR "Malawi" OR

"Mali" OR "Mauritania" OR "Mauritius" OR "Morocco" OR "Mozambique" OR "Namibia" OR "Niger" OR "Nigeria" OR "Rwanda" OR "Sao Tome and Principe" OR "Senegal" OR "Seychelles" OR

"Sierra Leone" OR "Somalia" OR "South Africa" OR "South Sudan" OR "Sudan" OR "Tanzania" OR "Togo" OR "Tunisia" OR "Uganda" OR "Zambia" OR "Zimbabwe")

)

AND (LIMIT-TO(DOCTYPE, "ar"))

AND (LIMIT-TO(LANGUAGE, "English"))

**Web of Science**

TS=(

("community-based intervention*" OR "community engagement" OR "community health workers" OR "community health programs" OR "community participation")

AND

("non-communicable disease*" OR "chronic disease*" OR "cardiovascular disease*" OR "hypertension" OR "diabetes mellitus" OR "neoplasms" OR "cancer" OR "chronic respiratory disease*" OR "asthma" OR "obesity" OR "mental disorder*" OR "schizophrenia" OR "parkinson*" OR "alzheimer*" OR "chronic kidney disease*")

AND

("Africa" OR "African" OR "Sub-Saharan Africa" OR "Sub Saharan Africa" OR "SSA" OR "West Africa" OR "East Africa" OR "Central Africa" OR "Southern Africa" OR "North Africa" OR

"Algeria" OR "Angola" OR "Benin" OR "Botswana" OR "Burkina Faso" OR "Burundi" OR "Cabo Verde" OR "Cape Verde" OR "Cameroon" OR "Central African Republic" OR "Chad" OR "Comoros" OR

"Congo" OR "Democratic Republic of Congo" OR "Republic of the Congo" OR "DRC" OR "Djibouti" OR "Egypt" OR "Equatorial Guinea" OR "Eritrea" OR "Eswatini" OR "Swaziland" OR "Ethiopia" OR

"Gabon" OR "Gambia" OR "Ghana" OR "Guinea" OR "Guinea-Bissau" OR "Ivory Coast" OR "Cote d'Ivoire" OR "Kenya" OR "Lesotho" OR "Liberia" OR "Libya" OR "Madagascar" OR "Malawi" OR

"Mali" OR "Mauritania" OR "Mauritius" OR "Morocco" OR "Mozambique" OR "Namibia" OR "Niger" OR "Nigeria" OR "Rwanda" OR "Sao Tome and Principe" OR "Senegal" OR "Seychelles" OR

"Sierra Leone" OR "Somalia" OR "South Africa" OR "South Sudan" OR "Sudan" OR "Tanzania" OR "Togo" OR "Tunisia" OR "Uganda" OR "Zambia" OR "Zimbabwe")

)

Timespan = 2000 to 2025
